# Supplementary material for: Molecular Characterization of Antimicrobial Resistance and Virulence Genes of Bacterial Pathogens from Bovine and Caprine Mastitis in Northern Lebanon
Source: MDPI journal article supplement (doi:10.3390/microorganisms9061148), 2021-05-27
Supplement: s1 [file s1]

| Table S1. Primer sequences used in PCRs |             |         |                             |                    |                            |
|-----------------------------------------|-------------|---------|-----------------------------|--------------------|----------------------------|
| Gene                                    | Primer name | Strand  | Nucleotide Sequence (5'-3') | Fragment size (bp) | Reference                  |
| <i>ica</i>                              | icaH-7c     | Forward | CTTTCGTTATAACAGGCAAG        | ~700               | Cucarella et al., 2004 [1] |
|                                         | icaH-1m     | Reverse | TATACCTTTCTTCGATGTCTG       |                    |                            |
| <i>bap</i>                              | sasp-7c     | Forward | GCTGTTGAAGTTAATACTGTACCTGC  | ~1000              | Cucarella et al., 2004 [1] |
|                                         | sasp-6m     | Reverse | CCCTATATCGAAGGTGTAGAATTGCAC |                    |                            |
| <i>bla<sub>CTX-M-4</sub></i>            | CTX-M IV    | Forward | GACAAAGAGAGTGCAACGGATG      | 501                | Kim et al., 2009 [2]       |
|                                         |             | Reverse | TCAGTGCGATCCAGACGAAA        |                    |                            |
| <i>bla<sub>TEM</sub></i>                | TEM         | Forward | AGTGCTGCCATAACCATGAGTG      | 431                | Kim et al., 2009 [2]       |
|                                         |             | Reverse | CTGACTCCCC GTCGTGTAGATA     |                    |                            |
| <i>bla<sub>OXA</sub></i>                | OXA         | Forward | ATTATCTACAGCAGCGCCAGTG      | 296                | Kim et al., 2009 [2]       |
|                                         |             | Reverse | TGCATCCACGTCTTTGGTG         |                    |                            |
| <i>bla<sub>SHV</sub></i>                | SHV         | Forward | GATGAACGCTTTCCCATGATG       | 214                | Kim et al., 2009 [2]       |
|                                         |             | Reverse | CGCTGTTATCGCTCATGGTAA       |                    |                            |
| <i>bla<sub>CMY-2</sub></i>              | CMY II      | Forward | AGCGATCCGGTCACGAAATA        | 695                | Kim et al., 2009 [2]       |
|                                         |             | Reverse | CCCGTTTTATG CACCCATGA       |                    |                            |
| <i>bla<sub>CTX-M-1</sub></i>            | CTX-M I     | Forward | TCCAGAATAAGGAATCCCATGG      | 621                | Kim et al., 2009 [2]       |
|                                         |             | Reverse | TGCTTTACCCAGCGTCAGAT        |                    |                            |
| <i>bla<sub>CTX-M-2</sub></i>            | CTX-M II    | Forward | ACCGCCGATAATTTCGAGAT        | 588                | Kim et al., 2009 [2]       |
|                                         |             | Reverse | GATATCGTTGGTGGTGCCATAA      |                    |                            |
| <i>bla<sub>DHA</sub></i>                | DHA         | Forward | GTGGTGGACAGCACCATTAAA       | 314                | Kim et al., 2009 [2]       |
|                                         |             | Reverse | CCTGCGGTATAGGTAGCCAGAT      |                    |                            |
| <i>chuA</i>                             | chuA.1b     | Forward | ATGGTACCGGACGAACCAAC        | 288                | Clermont et al., 2013 [3]  |
|                                         | chuA.2      | Reverse | TGCCGCCAGTACCAAAGACA        |                    | Clermont et al., 2000 [4]  |
| <i>yjaA</i>                             | yjaA.1b     | Forward | CAAACGTGAAGTGTGAGGAG        | 211                | Clermont et al., 2013 [3]  |
|                                         | yjaA.2b     | Reverse | AATGCGTTCCTCAACCTGTG        |                    | Clermont et al., 2013 [3]  |
| <i>TspE4C2</i>                          | TspE4C2.1b  | Forward | CACTATTCGTAAGGTCATCC        | 152                | Clermont et al., 2013 [3]  |
|                                         | TspE4C2.2b  | Reverse | AGTTTATCGCTGCGGGTTCGC       |                    | Clermont et al., 2013 [3]  |
| <i>arpA</i>                             | AceK.f      | Forward | AACGCTATTCGCCAGCTTGC        | 400                | Clermont et al., 2013 [3]  |

|             |           |         |                          |     |                              |
|-------------|-----------|---------|--------------------------|-----|------------------------------|
|             | ArpA1.r   | Reverse | TCTCCCCATACCGTACGCTA     |     | Clermont et al.,<br>2004 [5] |
| <i>arpA</i> | ArpAgpE.f | Forward | GATTCCATCTTGTCAAAATATGCC | 301 | Lescat et al.,<br>2013 [6]   |
|             | ArpAgpE.r | Reverse | GAAAAGAAAAAGAATTCCCAAGAG |     |                              |
| <i>trpA</i> | trpAgpC.1 | Forward | AGTTTTATGCCCAGTGCGAG     | 219 | Lescat et al.,<br>2013 [6]   |
|             | trpAgpC.2 | Reverse | TCTGCGCCGGTCACGCCC       |     |                              |
| <i>sea</i>  | GSEAR-1   | Forward | GGTTATCAATGTGCGGGTGG     | 102 | Mehrota et al.,<br>2000 [7]  |
|             | GSEAR-2   | Reverse | CGGCACTTTTTCTCTTCGG      |     |                              |
| <i>seb</i>  | GSEBR-1   | Forward | GTATGGTGGTGTAACTGAGC     | 164 | Mehrota et al.,<br>2000 [7]  |
|             | GSEBR-2   | Reverse | CCAAATAGTGACGAGTTAGG     |     |                              |
| <i>sec</i>  | GSECR-1   | Forward | AGATGAAGTAGTTGATGTGTATGG | 451 | Mehrota et al.,<br>2000 [7]  |
|             | GSECR-2   | Reverse | CACACTTTTAGAATCAACCG     |     |                              |
| <i>sed</i>  | GSEDR-1   | Forward | CCAATAATAGGAGAAAATAAAAG  | 278 | Mehrota et al.,<br>2000 [7]  |
|             | GSEDR-2   | Reverse | ATTGGTATTTTTTTTCGTTC     |     |                              |
| <i>see</i>  | GSEER-1   | Forward | AGGTTTTTTCACAGGTCATCC    | 209 | Mehrota et al.,<br>2000 [7]  |
|             | GSEER-2   | Reverse | CTTTTTTTTCTTCGGTCAATC    |     |                              |
| <i>seg</i>  | SEG-F     | Forward | GTTAGAGGAGGTTTTATG       | 198 | Bania et al.,<br>2006 [8]    |
|             | SEG-R     | Reverse | TTCCTTCAACAGGTGGAGA      |     |                              |
| <i>seh</i>  | SEH-F     | Forward | CAACTGCTGATTTAGCTCAG     | 173 | Bania et al.,<br>2006 [8]    |
|             | SEH-R     | Reverse | CCCAAACATTAGCACCA        |     |                              |
| <i>sei</i>  | SEI-F     | Forward | GGCCACTTTATCAGGACA       | 328 | Bania et al.,<br>2006 [8]    |
|             | SEI-R     | Reverse | AACTTACAGGCAGTCCA        |     |                              |
| <i>sej</i>  | SEJ-F     | Forward | GTTCTGGTGGTAAACCA        | 131 | Bania et al.,<br>2006 [8]    |
|             | SEJ-R     | Reverse | GCGGAACAACAGTTCTGA       |     |                              |
| <i>sep</i>  | SEP-F     | Forward | TCAAAAGACACCGCCAA        | 396 | Bania et al.,<br>2006 [8]    |
|             | SEP-R     | Reverse | ATTGTCCTTGAGCACCA        |     |                              |
| <i>femA</i> | GFEMAR-1  | Forward | AAAAAAGCACATAACAAGCG     | 132 | Mehrota et al.,<br>2000 [7]  |
|             | GFEMAR-2  | Reverse | GATAAAGAAGAAACCAGCAG     |     |                              |
| <i>mecA</i> | GMECAR-1  | Forward | ACTGCTATCCACCCTCAAAC     | 163 | Mehrota et al.,<br>2000 [7]  |
|             | GMECAR-2  | Reverse | CTGGTGAAGTTGTAATCTGG     |     |                              |
| <i>eta</i>  | GETAR-1   | Forward | GCAGGTGTTGATTTAGCATT     | 93  | Mehrota et al.,<br>2000 [7]  |
|             | GETAR-2   | Reverse | AGATGTCCCTATTTTTGCTG     |     |                              |
| <i>etb</i>  | GETBR-1   | Forward | ACAAGCAAAAGAATACAGCG     | 226 | Mehrota et al.,<br>2000 [7]  |
|             | GETBR-2   | Reverse | GTTTTTGGCTGCTTCTCTTG     |     |                              |
| <i>tst</i>  | GTSSTR-1  | Forward | ACCCCTGTTCCCTTATCATC     | 326 | Mehrota et al.,<br>2000 [7]  |
|             | GTSSTR-2  | Reverse | TTTTCAGTATTTGTAACGCC     |     |                              |

## References

1. Cucarella, C.; Tormo, M.A.; Ubeda, C.; Trotonda, M.P.; Monzón, M.; Peris, C.; Amorena, B.; Lasa, I.; Penadés, J.R. Role of biofilm-associated protein bap in the pathogenesis of bovine *Staphylococcus aureus*. *Infect Immun* **2004**, *72*, 2177-2185, doi:10.1128/iai.72.4.2177-2185.2004.
2. Kim, J.; Jeon, S.; Rhie, H.; Lee, B.; Park, M.; Lee, H.; Lee, J.; Kim, S. Rapid detection of extended spectrum  $\beta$ -Lactamase (ESBL) for *Enterobacteriaceae* by use of a multiplex PCR-based method. *Infect Chemother* **2009**, *41*, 181-184.
3. Clermont, O.; Christenson, J.K.; Denamur, E.; Gordon, D.M. The Clermont *Escherichia coli* phylo-typing method revisited: improvement of specificity and detection of new phylo-groups. *Environ Microbiol Rep* **2013**, *5*, 58-65, doi:10.1111/1758-2229.12019.
4. Clermont, O.; Bonacorsi, S.; Bingen, E. Rapid and simple determination of the *Escherichia coli* phylogenetic group. *Appl. Environ. Microbiol* **2000**, *66*, 4555-4558, doi:10.1128/aem.66.10.4555-4558.2000.
5. Clermont, O.; Bonacorsi, S.; Bingen, E. characterization of an anonymous molecular Marker strongly linked to *Escherichia coli* strains causing neonatal meningitis. *J Clin Microbiol* **2004**, *42*, 1770-1772, doi:10.1128/jcm.42.4.1770-1772.2004.
6. Lescat, M.; Clermont, O.; Woerther, P.L.; Glodt, J.; Dion, S.; Skurnik, D.; Djossou, F.; Dupont, C.; Perroz, G.; Picard, B.; et al. Commensal *Escherichia coli* strains in Guiana reveal a high genetic diversity with host-dependant population structure. *Environ Microbiol Rep* **2013**, *5*, 49-57, doi:10.1111/j.1758-2229.2012.00374.x.
7. Mehrotra, M.; Wang, G.; Johnson, W.M. Multiplex PCR for detection of genes for *Staphylococcus aureus* enterotoxins, exfoliative toxins, toxic shock syndrome toxin 1, and methicillin resistance. *J Clin Microbiol* **2000**, *38*, 1032-1035.
8. Bania, J.; Dabrowska, A.; Bystron, J.; Korzekwa, K.; Chrzanowska, J.; Molenda, J. Distribution of newly described enterotoxin-like genes in *Staphylococcus aureus* from food. *Int J Food Microbiol* **2006**, *108*, 36-41, doi:10.1016/j.ijfoodmicro.2005.10.013.
